# Supplementary material for: Effect of a Phytochemical-Rich Olive Derived Extract on Anthropometric, Hematological and Metabolic Parameters
Source: Preprints.org preprint supplement (doi:10.20944/preprints202408.0102.v1), 2024-08-04
Supplement: Supplementary file 2 [file supplementary]

**Figure S1.**

**

**

**Figure S2.**





**Figure S3.**
